# Supplementary material for: Development and validation of an electrosurgery-compatible simulation task for quantitatively assessing oral cancer resection skills
Source: Research Square preprint supplement (doi:10.21203/rs.3.rs-7565494/v1), 2025-11-04
Supplement: Supplementary file 1 [file 51b3cc882d3f403d598e4819.xlsx]

## Sheet: Addfile3
Supplementary Material 3	Topics on oral cancer resection raised in an expert focus group
	Theme	Categories	Fre	Subcategories	Fre	Codes	Fre	Examples
	Ensuring adequate margins	Preoperative plannning	29	Resection without excess or deficiency	14	Striving for resection without excess or deficiency	4	Achieving resection without excessive removal or overly close margins as planned preoperatively
						Functional impairment caused by excessive resection	3	Excessive resection may lead to functional impairment
						Reduced curability due to insufficient margins	7	Margins that are too close may result in residual tumor
				Setting the resection line preoperatively	15	Assessment of the extent of tumor invasion	5	Accurate evaluation of the extent of tumor invasion and planning
						Determining composite tissue for combined resection	7	Resection of bone when bone invasion is present
						Simulation of surgical steps	3	Simulating all tools and scenarios to be used
		Precise resection of soft tissue based on planning	58	Resection as envisioned preoperatively	52	Challenges in estimating the distance from the tumor	21	Following the preoperative plan is the most challenging aspect
						Difficulty in securing deep margins	11	Cutting deep areas with a three-dimensional image in mind is difficult
						Angle of the device	9	Shallow angles of the electrocautery can lead to closer deep margins
						Changes in resection lines due to soft tissue countertraction	11	Soft tissue shapes and positions change with countertraction, increasing difficulty
				Modification of the resection line based on intraoperative judgment	6	Responding to deviations from simulation	6	Although procedures generally follow the simulation, changes are necessary in cases of unexpected tumor progression
	Maintaining safety	Device usage in electrosurgery	29	Appropriate countertraction	29	Resection without collateral damage	5	Proper tension allows for early detection and appropriate handling of blood vessels
						Minimizing tissue charring during resection	8	Proper tension allows for early detection and appropriate handling of blood vessels
						Efficient dissection	11	Without proper tension, effective cutting becomes difficult
						Addressing changes in tissues caused by dissection	5	The direction of countertraction changes between the start and end of cutting, even for the same tissue
	Fre: Frequency represents the number of times the topic has been brought up in the discussion.
