# Supplementary material for: Development and validation of an electrosurgery-compatible simulation task for quantitatively assessing oral cancer resection skills
Source: Research Square preprint supplement (doi:10.21203/rs.3.rs-7565494/v1), 2025-11-04
Supplement: Supplementary file 2 [file 79ab981d891a017ba09284c2.docx]

**Expert Evaluation Questionnaire
Electrosurgery-Compatible Simulation Task for Oral Cancer Resection**

**Date (YYYY-MM-DD):** ____________________

**Instructions:** We have developed a surgical simulation task for oral cancer resection, intended for novice surgeons. Please complete this questionnaire immediately after performing the simulation task. Rate each statement on a 5-point Likert scale where 1 = Strongly disagree and 5 = Strongly agree. If an item does not apply or you are unsure, select 3 (Neither agree nor disagree).

**Participant Information**

Institution: ____________________

Board certification in Head & Neck Surgery (year): __________

Years since certification: __________

Estimated number of head & neck surgeries performed: __________

Age (years): __________

Sex: □ Male □ Female □ Other □ Prefer not to say

**Response scale:** 1 = Strongly disagree, 2 = Disagree, 3 = Neither agree nor disagree, 4 = Agree, 5 = Strongly agree

**Section A. Replication of Oral Cancer Resection**

| Statement | 1 | 2 | 3 | 4 | 5 |
| --- | --- | --- | --- | --- | --- |
| The simulation realistically replicates soft tissue resection in oral cancer surgery. | □ | □ | □ | □ | □ |
| The simulation allows realistic use of monopolar electrosurgical instruments. | □ | □ | □ | □ | □ |
| Overall, the simulation appropriately replicates oral cancer resection. | □ | □ | □ | □ | □ |

**Section B. Suitability of Quantitative Measures**

| Statement | 1 | 2 | 3 | 4 | 5 |
| --- | --- | --- | --- | --- | --- |
| The 'margin error distance (nine-directional)' is an appropriate metric for ensuring appropriate margins. | □ | □ | □ | □ | □ |
| The 'tumor bed carbonization (ΔE)' is an appropriate metric for maintaining safety in electrosurgery. | □ | □ | □ | □ | □ |
| Resection time is an appropriate metric for assessing performance. | □ | □ | □ | □ | □ |
| Number of repeated tissue grasps with forceps is an appropriate metric for assessing performance. | □ | □ | □ | □ | □ |
| Overall, the selected quantitative measures are appropriate to evaluate surgeons' skills. | □ | □ | □ | □ | □ |

**Section C. Usability and Educational Utility**

| Statement | 1 | 2 | 3 | 4 | 5 |
| --- | --- | --- | --- | --- | --- |
| The simulation task is convenient to set up and perform. | □ | □ | □ | □ | □ |
| The simulation is useful for training in oral cancer resection. | □ | □ | □ | □ | □ |

**Open-ended comments (optional)**

________________________________________________________________________________

________________________________________________________________________________

________________________________________________________________________________

________________________________________________________________________________

________________________________________________________________________________

Thank you for your participation.
