# Supplementary material for: Development and validation of an electrosurgery-compatible simulation task for quantitatively assessing oral cancer resection skills
Source: Research Square preprint supplement (doi:10.21203/rs.3.rs-7565494/v1), 2025-11-04
Supplement: Supplementary file 3 [file b23267973c88939f6a996cad.docx]

Discussion Guide for Focus Group

The purpose of this focus group is to elucidate the expert insights and experiential knowledge to developing simulation tasks for oral cancer resection.

1. What, in your view, constitutes a “good” oral cancer surgery?

2. What do you consider to be the key factors or strategies for performing a high-quality oral cancer surgery in actual clinical practice?

3. How did you acquire or learn the surgical techniques you currently use?

4. Please tell us about the devices you use. What aspects do you consider important or challenging when using them?

That concludes our questions. However, if there is anything else you feel we have not covered or any additional points you would like to discuss, please feel free to share.
